# Supplementary material for: A predictive model for therapy failure in patients with chronic myeloid leukemia receiving tyrosine kinase inhibitor therapy
Source: PubMed Central journal article supplement — Blood. 2024 Jul 29;144(18):1951–61. doi: 10.1182/blood.2024024761 (PMC11551847; doi:10.1182/blood.2024024761), 2024-07-29
Supplement: BLOOD_BLD-2024-024761-mmc1.pdf [file BLOOD_BLD-2024-024761-mmc1.pdf]

## **Supplement table legends**

**Supplement Table 1.** Distribution of additional cytogenetic abnormalities in Ph<sup>+</sup> cells at diagnosis.

**Supplement Table 2.** Subjects co-variates before and after propensity-score matching analysis.

**Supplement Table 3.** Uni-variable analyses on TKI-therapy failure in the training dataset.

**Supplement Table 4.** Multi-variable analyses in the 1,701 subjects with complete data for all the 12 candidate co-variates in the training dataset.

**Supplement Table 5.** Subjects co-variates in the low-risk subgroup by the predictive model before and after propensity-score matching analysis.

**Supplement Table 6.** Subjects co-variates in the intermediate-risk subgroup by the predictive model before and after propensity-score matching analysis.

**Supplement Table 7.** Subjects co-variates in the high-risk subgroup by the predictive model before and after propensity-score matching analysis.

**Supplement Table 1. Distribution of additional cytogenetic abnormalities in Ph<sup>+</sup> cells at diagnosis.**

| Classification                                 | Type                         | Frequency, n (%)   |                    |
|------------------------------------------------|------------------------------|--------------------|--------------------|
|                                                |                              | Training dataset   | Validation dataset |
| <b><i>ACAs in Ph<sup>+</sup> cells</i></b>     |                              | <b>68 (3%)</b>     | <b>118 (3%)</b>    |
| High-risk ACAs<br>in Ph <sup>+</sup> cells*    | Complex aberrant karyotypes  | 14 (0.7%)          | 16 (0.5%)          |
|                                                | a second Ph-chromosome (+Ph) | 9 (0.5%)           | 13 (0.4%)          |
|                                                | +8                           | 7 (0.4%)           | 8 (0.2%)           |
|                                                | 11q23                        | 3 (0.2%)           | 5 (0.1%)           |
|                                                | +19                          | 3 (0.2%)           | 3 (<0.1%)          |
|                                                | i(17q)                       | 2 (0.1%)           | 3 (<0.1%)          |
|                                                | -7/7q-                       | 2 (0.1%)           | 2 (<0.1%)          |
|                                                | 3q26.2                       | 1 (<0.1%)          | 1 (<0.1%)          |
| Non high-risk ACAs<br>in Ph <sup>+</sup> cells | -Y                           | 6 (0.3%)           | 8 (0.2%)           |
|                                                | +12                          | 2 (0.1%)           | 4 (0.1%)           |
|                                                | inv(9)                       | 2 (0.1%)           | 3 (<0.1%)          |
|                                                | Others                       | 17 (0.9%)          | 52 (2%)            |
| <b><i>No ACAs in Ph<sup>+</sup> cells</i></b>  |                              | <b>1,887 (97%)</b> | <b>3,336 (97%)</b> |

ACAs, Additional chromosomal aberrations; Ph<sup>+</sup> cells, Philadelphia chromosome-positive cells.

\* High-risk ACAs were defined according to the 2020 ELN recommendation.

**Supplement Table 2. Subjects co-variables before and after propensity-score matching analysis.**

| Co-variables                                           | <i>Before propensity-score matching</i> |                            |         | <i>After propensity-score matching</i> |                            |         |
|--------------------------------------------------------|-----------------------------------------|----------------------------|---------|----------------------------------------|----------------------------|---------|
|                                                        | Imatinib cohort<br>(n = 1,539)          | 2G-TKI cohort<br>(n = 416) | p-value | Imatinib cohort<br>(n = 694)           | 2G-TKI cohort<br>(n = 347) | p-value |
| Age, years, median (IQR)                               | 41 (31, 52)                             | 36 (28, 46)                | < 0.001 | 36 (26, 47)                            | 37 (25, 48)                | 0.47    |
| Male, n(%)                                             | 946 (62)                                | 249 (60)                   | 0.55    | 411 (59)                               | 202 (58)                   | 0.76    |
| Spleen size, cm below costal margin,<br>median (range) | 2 (0, 8)                                | 4 (0, 13)                  | < 0.001 | 5 (0, 12)                              | 5 (0, 12)                  | 0.35    |
| Sokal risk, n(%)                                       |                                         |                            | < 0.001 |                                        |                            | 0.75    |
| Low                                                    | 689 (45)                                | 130 (31)                   |         | 259 (37)                               | 128 (37)                   |         |
| Intermediate                                           | 451 (29)                                | 104 (25)                   |         | 206 (30)                               | 97 (28)                    |         |
| High                                                   | 271 (17)                                | 123 (30)                   |         | 229 (33)                               | 122 (35)                   |         |
| Unknown                                                | 128 (9)                                 | 59 (14)                    |         | -                                      | -                          |         |
| ELTS risk, n(%)                                        |                                         |                            | < 0.001 |                                        |                            | 0.99    |
| Low                                                    | 913 (59)                                | 202 (49)                   |         | 403 (58)                               | 202 (58)                   |         |
| Intermediate                                           | 375 (24)                                | 96 (23)                    |         | 191 (28)                               | 95 (27)                    |         |

|                                    |                |                |         |                |                |      |
|------------------------------------|----------------|----------------|---------|----------------|----------------|------|
| High                               | 123 (8)        | 59 (14)        |         | 100 (14)       | 50 (15)        |      |
| Unknown                            | 128 (9)        | 59 (14)        |         | -              | -              |      |
| WBC, ×10E+9/L, median (IQR)        | 108 (44, 218)  | 163 (58, 277)  | < 0.001 | 150 (61, 276)  | 153 (60, 270)  | 0.26 |
| Hemoglobin, ×10E+9/L, median (IQR) | 117 (98, 133)  | 111 (94, 129)  | < 0.001 | 110 (92, 127)  | 109 (92, 126)  | 0.31 |
| Platelets, ×10E+9/L, median (IQR)  | 403 (263, 622) | 454 (289, 707) | < 0.001 | 444 (299, 743) | 440 (296, 740) | 0.69 |
| Blood blasts, %, median (IQR)      | 1 (0, 2)       | 1 (0, 4)       | < 0.001 | 1 (0, 4)       | 1 (0, 4)       | 0.72 |
| Blood basophils, %, median (IQR)   | 5 (2, 8)       | 5 (3, 9)       | 0.01    | 5 (2, 8)       | 5 (3, 9)       | 0.60 |
| Blood eosinophils, %, median (IQR) | 2 (1, 4)       | 2 (0, 4)       | 0.12    | 2 (1, 4)       | 2 (1, 4)       | 0.85 |
| Ph <sup>+</sup> ACAs, n (%)        | 51 (3)         | 17 (4)         | 0.45    | 28 (4)         | 15 (4)         | 0.83 |
| High-risk ACAs, n (%)              | 29 (2)         | 12 (3)         | 0.21    | 14 (2)         | 10 (3)         | 0.38 |
| Co-morbidity, n (%)                | 562 (37)       | 138 (33)       | 0.21    | 243 (35)       | 120 (35)       | 0.89 |

ACAs, Additional chromosomal aberrations; ELTS, European Treatment and Outcome Study (EUTOs) long-term survival; WBC, White blood cell.

**Supplement Table 3.** Uni-variable analyses on TKI-therapy failure in the training dataset.

| <b>Uni-variable Cox analyses</b>                 |                               |                    |                |
|--------------------------------------------------|-------------------------------|--------------------|----------------|
| <b>Co-variate</b>                                | <b>Regression coefficient</b> | <b>HR (95% CI)</b> | <b>p-value</b> |
| Male (Categorical)                               | 0.1545                        | 1.2 (1.0 - 1.4)    | 0.08           |
| Age, years (Continuous)                          | 0.0027                        | 1.0 (1.0 - 1.0)    | 0.19           |
| Spleen size below costal margin, cm (Continuous) | 0.0782                        | 1.1 (1.1 - 1.1)    | < 0.001        |
| WBC, ×10E+9/L (Continuous)                       | 0.0028                        | 1.0 (1.0 - 1.0)    | < 0.001        |
| Haemoglobin, g/L (Continuous)                    | -0.0238                       | 0.9 (0.9 - 0.9)    | < 0.001        |
| Platelet, ×10E+9/L (Continuous)                  | 0.00004                       | 1.0 (1.0 - 1.0)    | 0.73           |
| Blood blasts, % (Continuous)                     | 0.1454                        | 1.2 (1.1 - 1.2)    | < 0.001        |
| Blood basophils, % (Continuous)                  | 0.0096                        | 1.0 (1.0 - 1.0)    | 0.15           |
| Blood eosinophils, % (Continuous)                | 0.0354                        | 1.0 (1.0 - 1.1)    | 0.04           |
| Ph <sup>+</sup> ACAs* (Categorical)              |                               |                    | 0.006          |
| <i>No ACAs (as reference)</i>                    | -                             | -                  | -              |
| <i>Non-high-risk ACAs</i>                        | 0.4073                        | 1.5 (0.7 - 3.0)    | 0.25           |
| <i>High-risk ACAs</i>                            | 0.7113                        | 2.0 (1.3 - 3.2)    | 0.002          |
| Co-morbidity(ies)* (Categorical)                 | -0.1020                       | 0.9 (0.7 - 1.1)    | 0.29           |
| Initial 2G-TKI therapy* (Categorical)            | 0.0446                        | 1.0 (0.8 - 1.3)    | 0.69           |
| <b>Uni-variable Fine-Gray analyses</b>           |                               |                    |                |
| <b>Co-variate</b>                                | <b>Regression coefficient</b> | <b>HR (95% CI)</b> | <b>p-value</b> |
| Male (Categorical)                               | 0.1440                        | 1.2 (1.0 – 1.4)    | 0.12           |
| Age, years (Continuous)                          | 0.0032                        | 1.0 (1.0 – 1.0)    | 0.19           |
| Spleen size below costal margin, cm (Continuous) | 0.0777                        | 1.1 (1.1 – 1.1)    | < 0.001        |
| WBC, ×10E+9/L (Continuous)                       | 0.0028                        | 1.0 (1.0 – 1.0)    | < 0.001        |
| Hemoglobin, g/L (Continuous)                     | -0.0237                       | 0.9 (0.9 – 0.9)    | < 0.001        |

|                                       |         |                 |         |
|---------------------------------------|---------|-----------------|---------|
| Platelet, ×10E+9/L (Continuous)       | 0.00004 | 1.0 (1.0 - 1.0) | 0.75    |
| Blood blasts, % (Continuous)          | 0.1460  | 1.2 (1.1 – 1.2) | < 0.001 |
| Blood basophils, % (Continuous)       | 0.0099  | 1.0 (1.0 – 1.0) | 0.13    |
| Blood eosinophils, % (Continuous)     | 0.0343  | 1.0 (1.0 – 1.1) | 0.04    |
| Ph <sup>+</sup> ACAs* (Categorical)   |         |                 | 0.006   |
| <i>No ACAs (as reference)</i>         | -       | -               | -       |
| <i>Non-high-risk ACAs</i>             | 0.4030  | 1.5 (0.7 - 3.1) | 0.28    |
| <i>High-risk ACAs</i>                 | 0.7080  | 2.0 (1.3 – 3.2) | 0.002   |
| Co-morbidity(ies)* (Categorical)      | -0.1080 | 0.9 (0.7 – 1.1) | 0.25    |
| Initial 2G-TKI therapy* (Categorical) | 0.0407  | 1.0 (0.8 - 1.3) | 0.71    |

\* Ph<sup>+</sup> ACAs, High-risk ACAs, comorbidity(ies) and initial 2G-TKI therapy were scored as categorical co-variables (“Y/N”) in the regression models.

2G-TKI, the second generation tyrosine kinase inhibitor; ACAs, additional chromosomal aberrations; CI, confidential interval; HR, hazard ratio.

**Supplement Table 4.** Multi-variable analyses in the 1,884 subjects with complete data for all the 12 candidate co-variates in the training dataset.

| <b>Multi-variable Cox analyses</b>       |                               |                    |                |
|------------------------------------------|-------------------------------|--------------------|----------------|
| <b>Co-variates</b>                       | <b>Regression coefficient</b> | <b>HR (95% CI)</b> | <b>p-value</b> |
| Male                                     | 0.2912                        | 1.3 (1.1, 1.6)     | 0.004          |
| Age, years                               | 0.0187                        | 1.0 (1.0, 1.0)     | < 0.001        |
| Hemoglobin, g/L                          | -0.0182                       | 0.9 (0.9, 0.9)     | < 0.001        |
| Blood blasts, %                          | 0.1016                        | 1.1 (1.1, 1.1)     | < 0.001        |
| Spleen size, cm below costal margin      | 0.0521                        | 1.1 (1.0, 1.1)     | < 0.001        |
| High-risk ACAs in Ph <sup>+</sup> cells* | 0.6049                        | 1.8 (1.1, 3.0)     | 0.02           |
| <b>Multi-variable Fine-Gray analyses</b> |                               |                    |                |
| <b>Co-variates</b>                       | <b>Regression coefficient</b> | <b>HR (95% CI)</b> | <b>p-value</b> |
| Male                                     | 0.2821                        | 1.3 (1.1, 1.6)     | < 0.001        |
| Age, years                               | 0.0186                        | 1.0 (1.0, 1.0)     | < 0.001        |
| Hemoglobin, g/L                          | -0.0182                       | 0.9 (0.9, 0.9)     | < 0.001        |
| Blood blasts, %                          | 0.0954                        | 1.1 (1.1, 1.1)     | < 0.001        |
| Spleen size, cm below costal margin      | 0.0500                        | 1.1 (1.0, 1.1)     | < 0.001        |
| High-risk ACAs in Ph <sup>+</sup> cells* | 0.5793                        | 1.8 (1.1, 2.8)     | 0.01           |

\* High-risk ACAs in Ph<sup>+</sup> cells was scored as categorical co-variates ("Y/N") in the regression models.

ACAs, additional chromosomal aberrations; CI, confidential interval; HR, hazard ratio.



**Supplement Table 5. Subjects co-variables in the low-risk cohort by the predictive model before and after propensity-score matching analysis.**

| Co-variables                                           | <i>Before propensity-score matching</i> |                            |                 | <i>After propensity-score matching</i> |                            |                 |
|--------------------------------------------------------|-----------------------------------------|----------------------------|-----------------|----------------------------------------|----------------------------|-----------------|
|                                                        | Imatinib cohort<br>(n = 1,389)          | 2G-TKI cohort<br>(n = 506) | <i>p</i> -value | Imatinib cohort<br>(n = 920)           | 2G-TKI cohort<br>(n = 460) | <i>p</i> -value |
| Age, years, median (IQR)                               | 37 (29, 47)                             | 35 (28, 44)                | 0.001           | 36 (28, 47)                            | 36 (29, 47)                | 0.90            |
| Male, n(%)                                             | 706 (51)                                | 271 (54)                   | 0.29            | 548 (60)                               | 275 (60)                   | 0.94            |
| Spleen size, cm below costal margin,<br>median (range) | 0 (0, 1)                                | 0 (0, 1)                   | 0.69            | 0 (0, 1)                               | 0 (0, 1)                   | 0.94            |
| Sokal risk*, n(%)                                      |                                         |                            | 0.25            |                                        |                            | 0.65            |
| Low                                                    | 1,175 (85)                              | 422 (83)                   |                 | 773 (84)                               | 386 (84)                   |                 |
| Intermediate                                           | 153 (11)                                | 52 (10)                    |                 | 110 (12)                               | 51 (11)                    |                 |
| High                                                   | 59 (4)                                  | 32 (7)                     |                 | 37 (4)                                 | 23 (5)                     |                 |
| Unknown                                                | 2 (<0.1)                                | 0 (0)                      |                 | 0 (0)                                  | 0 (0)                      |                 |
| ELTS risk*, n(%)                                       |                                         |                            | 0.81            |                                        |                            | 0.78            |
| Low                                                    | 1,367 (98)                              | 497 (98)                   |                 | 902 (98)                               | 452 (98)                   |                 |

|                                    |                |                |      |                |                |      |
|------------------------------------|----------------|----------------|------|----------------|----------------|------|
| Intermediate                       | 19 (2)         | 9 (2)          |      | 18 (2)         | 8 (2)          |      |
| High                               | 1 (<0.1)       | 0 (0)          |      | 0 (0)          | 0 (0)          |      |
| Unknown                            | 2 (<0.1)       | 0 (0)          |      | 0 (0)          | 0 (0)          |      |
| WBC, ×10E+9/L, median (IQR)        | 60 (30, 120)   | 62 (29, 136)   | 0.13 | 56 (30, 105)   | 55 (26, 107)   | 0.92 |
| Hemoglobin, ×10E+9/L, median (IQR) | 125 (113, 139) | 127 (112, 139) | 0.52 | 132 (121, 144) | 133 (123, 144) | 0.72 |
| Platelets, ×10E+9/L, median (IQR)  | 426 (279, 653) | 437 (282, 709) | 0.18 | 426 (276, 659) | 413 (271, 695) | 0.66 |
| Blood blasts, %, median (IQR)      | 0 (0, 1)       | 0 (0, 1)       | 0.03 | 0 (0, 1)       | 0 (0, 1)       | 0.96 |
| Blood basophils, %, median (IQR)   | 4 (2, 6)       | 4 (2, 6)       | 0.90 | 4 (2, 6)       | 4 (2, 6)       | 0.78 |
| Blood eosinophils, %, median (IQR) | 2 (0, 3)       | 1 (0, 2)       | 0.12 | 0 (0, 1)       | 0 (0, 1)       | 0.55 |
| Ph <sup>+</sup> ACAs, n (%)        | 18 (1)         | 8 (2)          | 0.64 | 10 (1)         | 4 (1)          | 0.79 |
| High-risk ACAs*, n (%)             | 2 (0.1)        | 0 (0)          | 1.00 | 1 (0.1)        | 0 (0)          | 1.00 |
| Co-morbidity, n (%)                | 316 (23)       | 112 (22)       | 0.78 | 202 (22)       | 103 (22)       | 0.85 |

ACAs, Additional chromosomal aberrations; ELTS, European Treatment and Outcome Study (EUTOs) long-term survival; WBC, White blood cell.

\* Fisher test.

**Supplement Table 6. Subjects co-variables in the intermediate-risk cohort by the predictive model before and after propensity-score matching analysis.**

| Co-variables                                           | <i>Before propensity-score matching</i> |                            |                 | <i>After propensity-score matching</i> |                            |                 |
|--------------------------------------------------------|-----------------------------------------|----------------------------|-----------------|----------------------------------------|----------------------------|-----------------|
|                                                        | Imatinib cohort<br>(n = 1,907)          | 2G-TKI cohort<br>(n = 670) | <i>p</i> -value | Imatinib cohort<br>(n = 844)           | 2G-TKI cohort<br>(n = 422) | <i>p</i> -value |
| Age, years, median (IQR)                               | 47 (35, 58)                             | 42 (32, 53)                | < 0.001         | 40 (31, 51)                            | 40 (30, 50)                | 0.86            |
| Male, n(%)                                             | 1,238 (65)                              | 431 (64)                   | 0.78            | 515 (61)                               | 249 (59)                   | 0.49            |
| Spleen size, cm below costal margin,<br>median (range) | 5 (2, 9)                                | 6 (3, 10)                  | < 0.001         | 5 (2, 10)                              | 5 (2, 10)                  | 0.98            |
| Sokal risk*, n(%)                                      |                                         |                            | 0.87            |                                        |                            | 0.92            |
| Low                                                    | 541 (28)                                | 191 (29)                   |                 | 245 (29)                               | 122 (29)                   |                 |
| Intermediate                                           | 1,050 (55)                              | 362 (54)                   |                 | 456 (54)                               | 232 (55)                   |                 |
| High                                                   | 315 (17)                                | 117 (17)                   |                 | 143 (17)                               | 68 (16)                    |                 |
| Unknown                                                | 1 (<0.1)                                | 0 (0)                      |                 | 0 (0)                                  | 0 (0)                      |                 |
| ELTS risk*, n(%)                                       |                                         |                            | 0.87            |                                        |                            | 0.29            |
| Low                                                    | 1,059 (56)                              | 376 (56)                   |                 | 456 (54)                               | 236 (56)                   |                 |

|                                    |                |                |         |                |                |      |
|------------------------------------|----------------|----------------|---------|----------------|----------------|------|
| Intermediate                       | 764 (40)       | 269 (40)       |         | 346 (41)       | 173 (41)       |      |
| High                               | 83 (4)         | 25 (4)         |         | 42 (5)         | 13 (3)         |      |
| Unknown                            | 1 (<0.1)       | 0 (0)          |         | 0 (0)          | 0 (0)          |      |
| WBC, ×10E+9/L, median (IQR)        | 154 (75, 258)  | 181 (100, 279) | < 0.001 | 189 (102, 288) | 182 (101, 287) | 0.50 |
| Hemoglobin, ×10E+9/L, median (IQR) | 107 (92, 122)  | 103 (89, 118)  | 0.004   | 101 (89, 113)  | 102 (90, 114)  | 0.91 |
| Platelets, ×10E+9/L, median (IQR)  | 406 (258, 610) | 401 (260, 635) | 0.93    | 428 (274, 656) | 403 (261, 621) | 0.42 |
| Blood blasts, %, median (IQR)      | 1 (0, 2)       | 1 (0, 2)       | 0.99    | 1 (0, 2)       | 1 (0, 3)       | 0.31 |
| Blood basophils, %, median (IQR)   | 4 (2, 7)       | 4 (2, 7)       | 0.13    | 5 (2, 8)       | 5 (2, 8)       | 0.71 |
| Blood eosinophils, %, median (IQR) | 2 (1, 4)       | 3 (1, 5)       | 0.39    | 0 (0, 1)       | 0 (0, 1)       | 0.67 |
| Ph <sup>+</sup> ACAs, n (%)        | 70 (4)         | 33 (5)         | 0.16    | 31 (4)         | 20 (3)         | 0.36 |
| High-risk ACAs, n (%)              | 31 (2)         | 17 (3)         | 0.13    | 15 (2)         | 12 (2)         | 0.22 |
| Co-morbidity, n (%)                | 522 (27)       | 184 (28)       | 0.96    | 218 (26)       | 111 (26)       | 0.86 |

ACAs, Additional chromosomal aberrations; ELTS, European Treatment and Outcome Study (EUTOs) long-term survival; WBC, White blood cell.

\* Fisher test.

**Supplement Table 7. Subjects co-variables in the high-risk cohort by the predictive model before and after propensity-score matching analysis.**

| Co-variables                                           | <i>Before propensity-score matching</i> |                            |                 | <i>After propensity-score matching</i> |                            |                 |
|--------------------------------------------------------|-----------------------------------------|----------------------------|-----------------|----------------------------------------|----------------------------|-----------------|
|                                                        | Imatinib cohort<br>(n = 325)            | 2G-TKI cohort<br>(n = 183) | <i>p</i> -value | Imatinib cohort<br>(n = 158)           | 2G-TKI cohort<br>(n = 158) | <i>p</i> -value |
| Age, years, median (IQR)                               | 42 (32, 54)                             | 44 (30, 53)                | 0.52            | 45 (33, 56)                            | 47 (33, 54)                | 0.99            |
| Male, n(%)                                             | 214 (66)                                | 130 (71)                   | 0.23            | 106 (67)                               | 109 (69)                   | 0.72            |
| Spleen size, cm below costal margin,<br>median (range) | 16 (8, 18)                              | 15 (9, 18)                 | 0.78            | 15 (6, 17)                             | 15 (8, 18)                 | 0.96            |
| Sokal risk*, n(%)                                      |                                         |                            | 0.55            |                                        |                            | 0.88            |
| Low                                                    | 6 (2)                                   | 5 (3)                      |                 | 5 (3)                                  | 3 (2)                      |                 |
| Intermediate                                           | 51 (16)                                 | 35 (19)                    |                 | 27 (17)                                | 28 (18)                    |                 |
| High                                                   | 267 (82)                                | 142 (77)                   |                 | 126 (80)                               | 127 (80)                   |                 |
| Unknown                                                | 1 (0.3)                                 | 1 (<1)                     |                 | 0 (0)                                  | 0 (0)                      |                 |
| ELTS risk*, n(%)                                       |                                         |                            | 0.25            |                                        |                            | 0.34            |
| Low                                                    | 11 (3)                                  | 6 (3)                      |                 | 3 (2)                                  | 0 (0)                      |                 |

|                                    |                |                |       |                |                |      |
|------------------------------------|----------------|----------------|-------|----------------|----------------|------|
| Intermediate                       | 135 (42)       | 61 (33)        |       | 57 (36)        | 58 (37)        |      |
| High                               | 178 (55)       | 115 (63)       |       | 98 (62)        | 100 (63)       |      |
| Unknown                            | 1 (0.3)        | 1 (<1)         |       | 0 (0)          | 0 (0)          |      |
| WBC, ×10E+9/L, median (IQR)        | 246 (153, 361) | 253 (160, 367) | 0.69  | 238 (135, 353) | 242 (142, 359) | 0.91 |
| Hemoglobin, ×10E+9/L, median (IQR) | 86 (74, 100)   | 89 (77, 104)   | 0.32  | 87 (77, 98)    | 88 (76, 99)    | 0.99 |
| Platelets, ×10E+9/L, median (IQR)  | 391 (266, 585) | 364 (230, 608) | 0.04  | 430 (284, 654) | 395 (260, 675) | 0.96 |
| Blood blasts, %, median (IQR)      | 4 (1, 7)       | 4 (2, 8)       | 0.11  | 4 (2, 8)       | 4 (2, 9)       | 0.61 |
| Blood basophils, %, median (IQR)   | 5 (2, 8)       | 6 (3, 9)       | 0.23  | 6 (3, 9)       | 6 (3, 9)       | 0.87 |
| Blood eosinophils, %, median (IQR) | 4 (1, 6)       | 4 (2, 6)       | 0.12  | 4 (1, 6)       | 4 (1, 6)       | 0.77 |
| Ph <sup>+</sup> ACAs, n (%)        | 28 (9)         | 15 (8)         | 0.87  | 14 (9)         | 12 (8)         | 0.68 |
| High-risk ACAs, n (%)              | 19 (6)         | 13 (7)         | 0.58  | 10 (6)         | 8 (5)          | 0.63 |
| Co-morbidity, n (%)                | 69 (21)        | 58 (32)        | 0.009 | 40 (25)        | 41 (26)        | 0.90 |

ACAs, Additional chromosomal aberrations; ELTS, European Treatment and Outcome Study (EUTOs) long-term survival; WBC, White blood cell.

\* Fisher test.

## Supplement information

### Supplement figure legends

**Supplement Figure 1.** Comparison outcomes between imatinib and 2G-TKI cohorts in the training dataset before and after propensity-score matching (PSM) analyses.

**Supplement Figure 2.** Comparison outcomes between training and validation datasets.

**Supplement Figure 3.** Kernel density plot of optimal cutoffs for the predictive model.

**Supplement Figure 4.** Performance of the predictive model for the cumulative incidence of therapy-failure.

**Supplement Figure 5.** Cumulative incidences of therapy-failure by different age subgroups.

**Supplement Figure 6.** Cumulative incidences of molecular responses and probabilities of TFS, CML-related survival by the predictive model.

**Supplement Figure 7.** Cumulative incidences of therapy-failure by the Sokal and ELTS risk subgroups in the entire dataset.

**Supplement Figure 8.** The 1-, 3- and 5-year area under the receiver operating characteristic curve (AUROC) values of Sokal, ELTS and the therapy-failure models in the entire, imatinib and 2G-TKI cohorts.

**Supplement Figure 9.** Decision curve analyses (DCA) of the predictive model, Sokal and ELTS scores for predicting the 1-, 3- and 5-year cumulative incidences of the therapy-failure in the entire, imatinib and 2G-TKI cohorts.

**Supplement Figure 10.** Comparison of the cumulative incidences of therapy-failure between subjects receiving initial 2G-TKI- and imatinib-therapy using the predictive model before and after propensity-score matching (PSM) analyses.



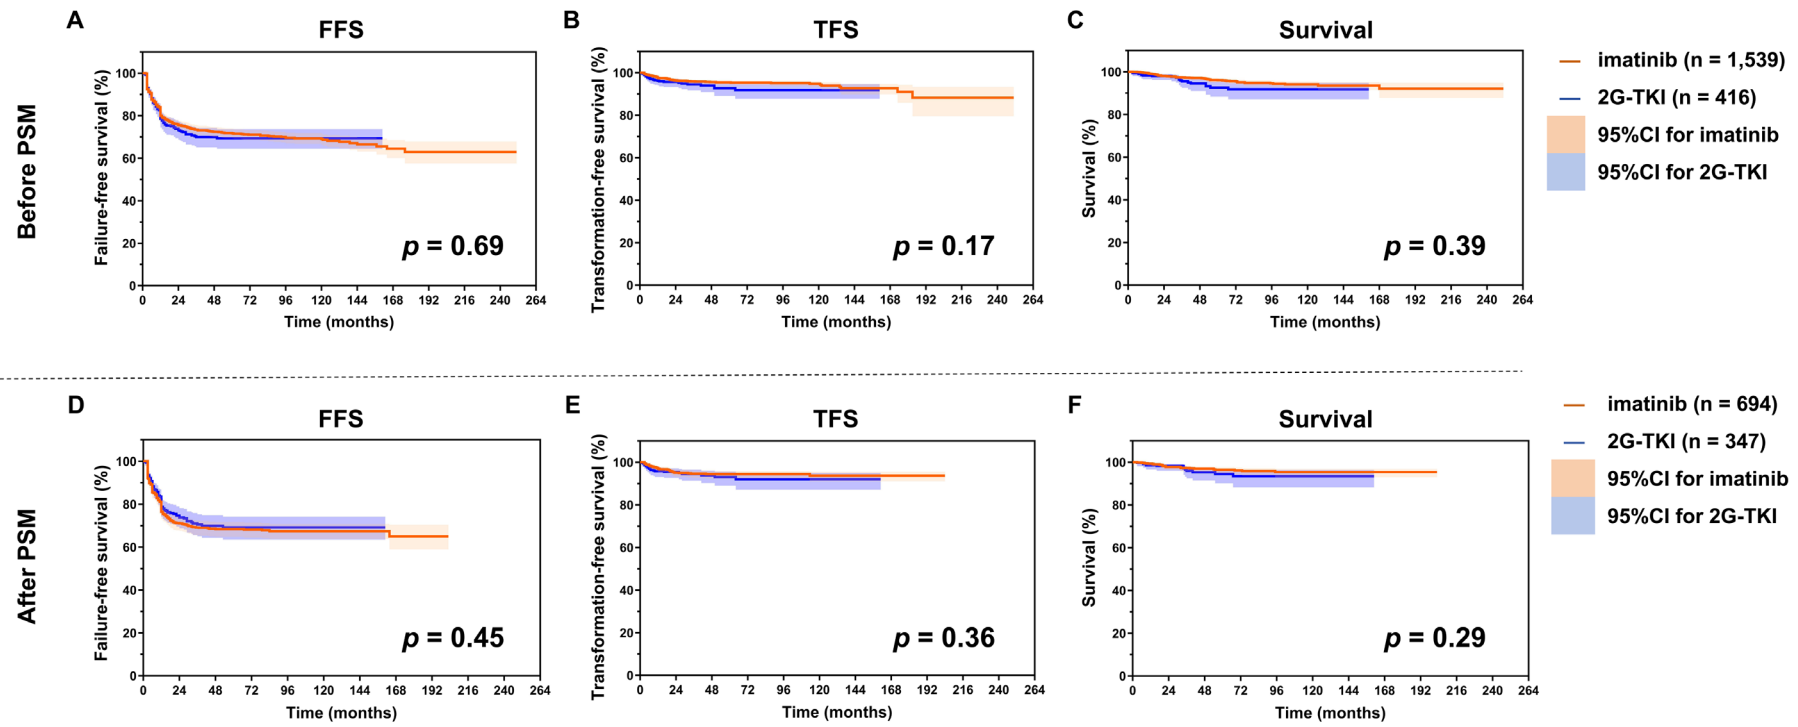

**Supplement Figure 1. Comparison outcomes between imatinib and 2G-TKI cohorts in the training dataset before and after propensity-score matching (PSM) analyses.**

2G-TKI, the second-generation tyrosine kinase inhibitor; FFS, failure-free survival; TFS, transformation-free survival; Shaded area is the 95% Confidence Interval.

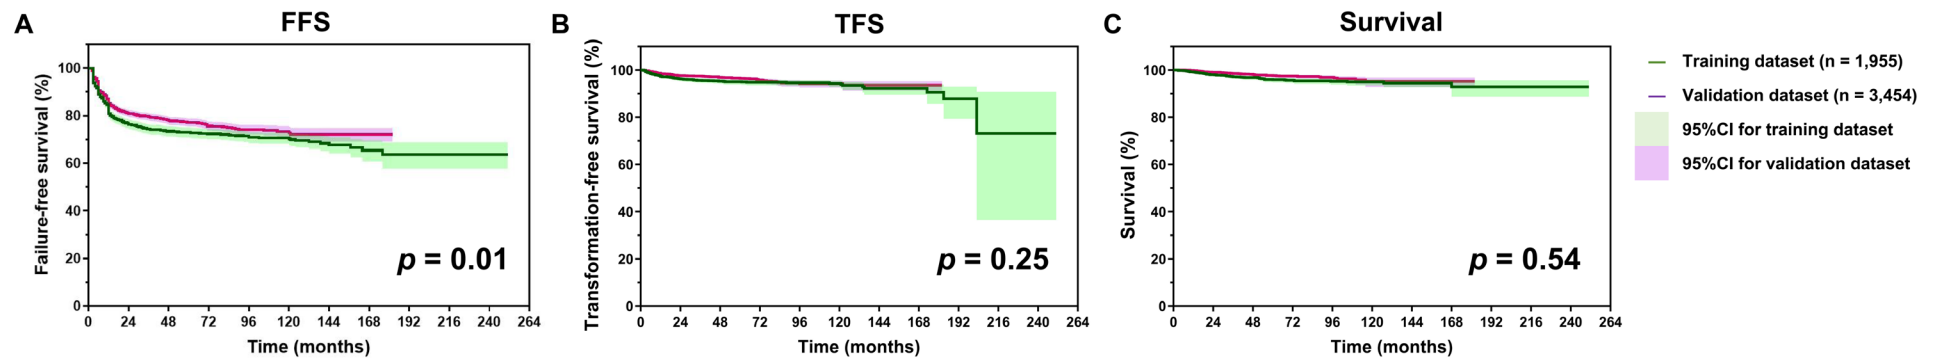

**Supplement Figure 2. Comparison outcomes between training and validation datasets.**

FFS, failure-free survival; TFS, transformation-free survival; Shaded area is the 95% Confidence Interval.

### Kernel density estimation

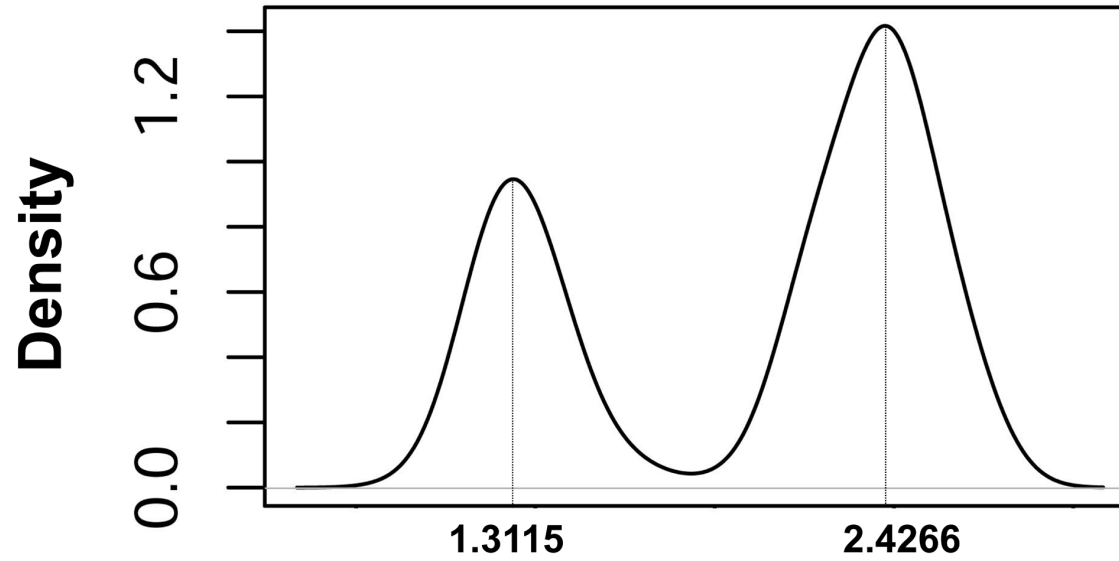

Supplement Figure 3. Kernel density plot of optimal cutoffs for the predictive model.

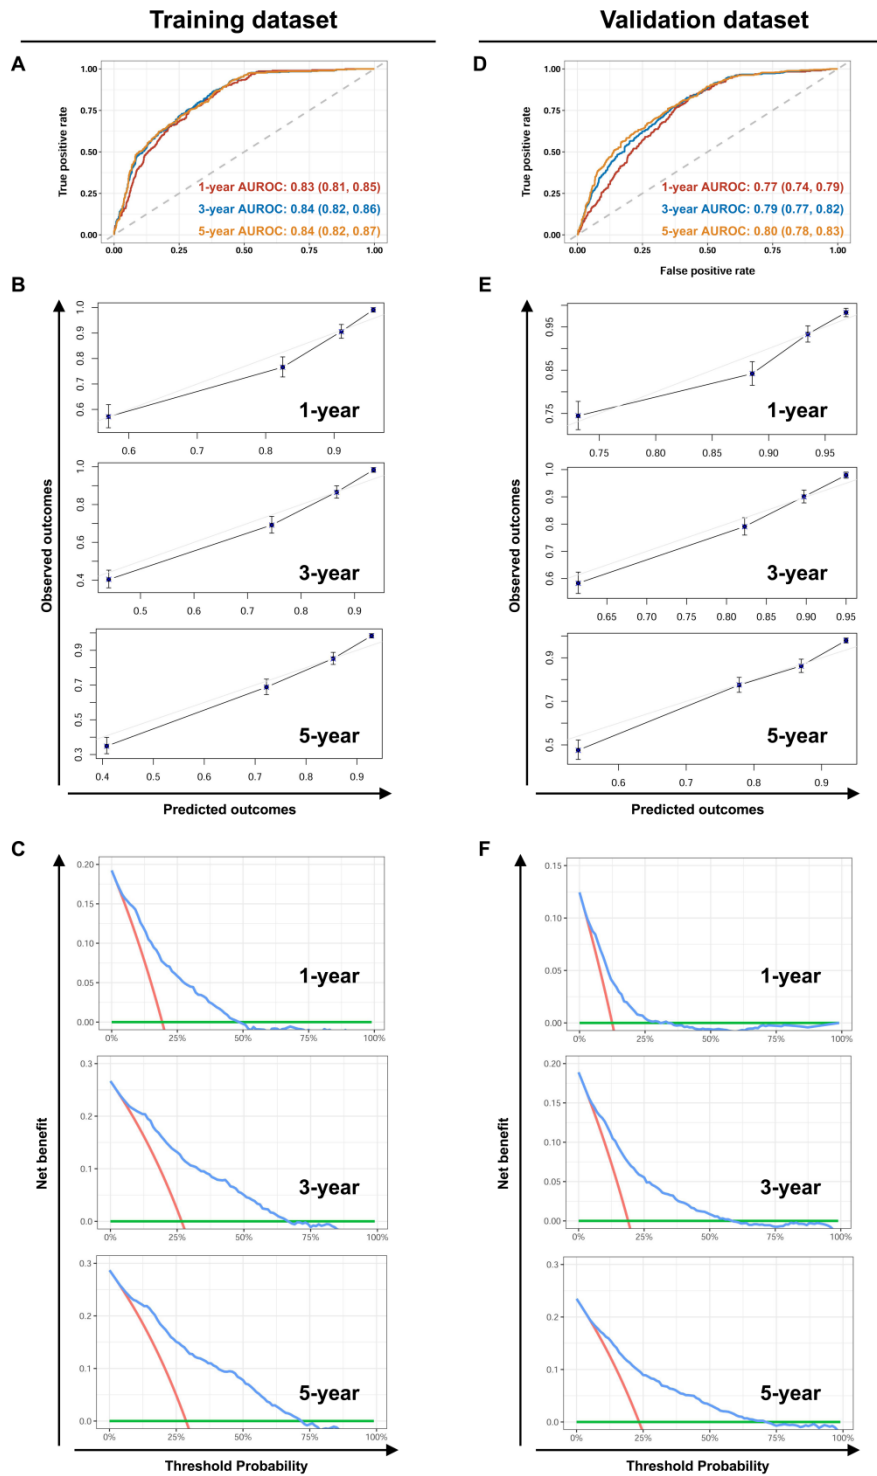

**Supplement Figure 4. Performance of the predictive model for the cumulative incidence of therapy-failure.**

(A) AUROC curves of the predictive model for 1-, 3- and 5-year cumulative incidences of therapy-failure in the training dataset; (B) Calibration plots of the model for predicting 1-, 3- and 5-year cumulative incidences of

therapy-failure in the training dataset. Predicted probabilities of 1-, 3- and 5-year cumulative incidences of therapy-failure were plotted on the x-axis; actual cumulative incidences of therapy-failure were plotted on the y-axis. An ideal calibration plot is indicated by a 45° diagonal line; (C) Decision curve analysis of the predictive model for predicting the 1-, 3- and 5-year cumulative incidences of the therapy-failure in the training dataset; (D) AUROC curves of the predictive model for the 1-, 3- and 5-year cumulative incidences of therapy-failure in the validation dataset; (E) Calibration plots of the predictive model for predicting 1-, 3- and 5-year cumulative incidences of therapy-failure in the validation dataset. (F) Decision curve analysis of the predictive model for predicting the 1-, 3- and 5-year cumulative incidences of therapy-failure in the validation dataset. DCA plots of the “net benefit” against “threshold probabilities (P(t))”, assessing the clinical usefulness of the predictive model at appropriate thresholds for clinical use. Net benefit measures the trade-off between true- and false-positives in the prediction model at different threshold probabilities (P(t)). It is a sum of true- minus false-positive predictions weighted by the threshold probability as described in the following equation: 
$$Net\ benefit = (true\ positive\ count / n) - (false\ positive\ count / n) \times (P(t)/1-P(t)).$$
 The threshold is a clinically derived value that varies depending on how risk averse the clinician is. It is a value where the clinician would be satisfied with the trade-off between the harm of delaying intervention (targeted follow-up) and unnecessary intervention. The x-axis is the threshold probability. In the risk model the cumulative incidence of the therapy failure is recorded as P(i). When P(i) reaches a certain threshold (scored as P(t)) an intervention is done. People will benefit from the intervention and there will be a detriment to people not taking the intervention. The Y-axis is the net benefit after the intervention minus the harm of not intervening.

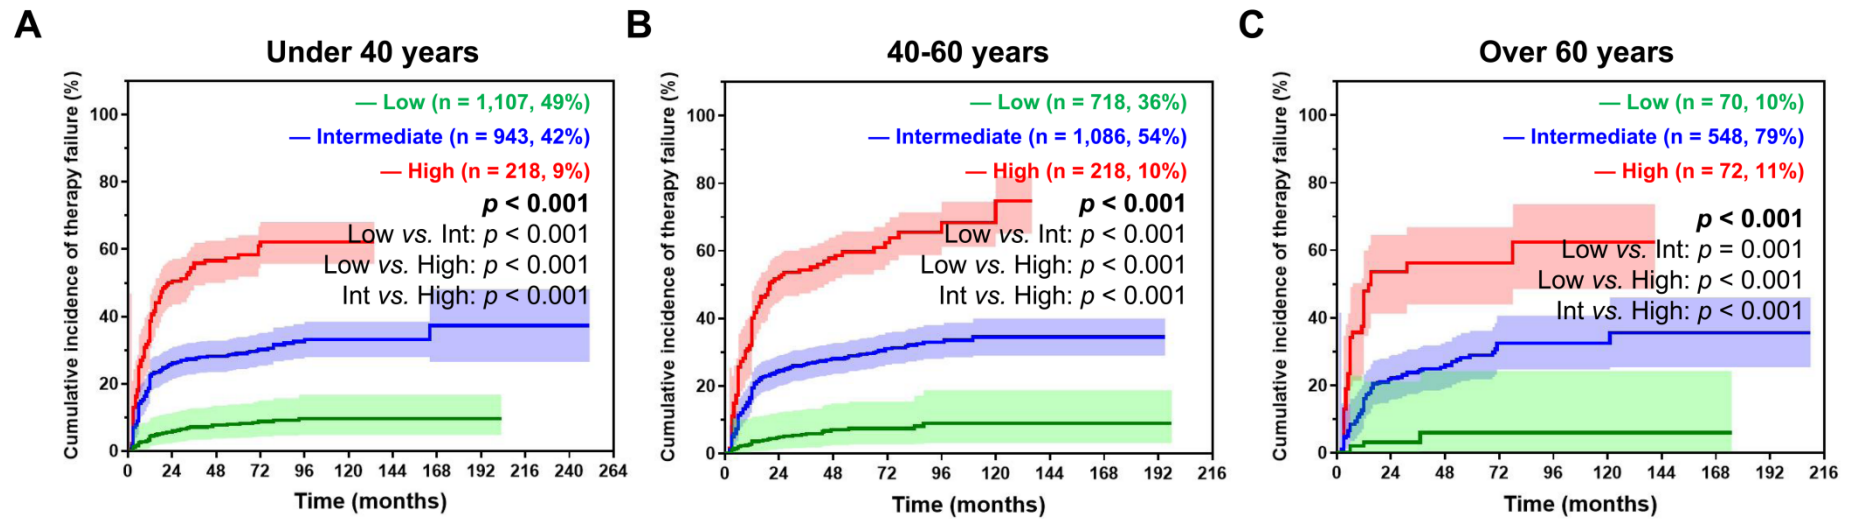

**Supplement Figure 5. Cumulative incidences of therapy-failure by different age subgroups.**

Shaded area is the 95% Confidence Interval.

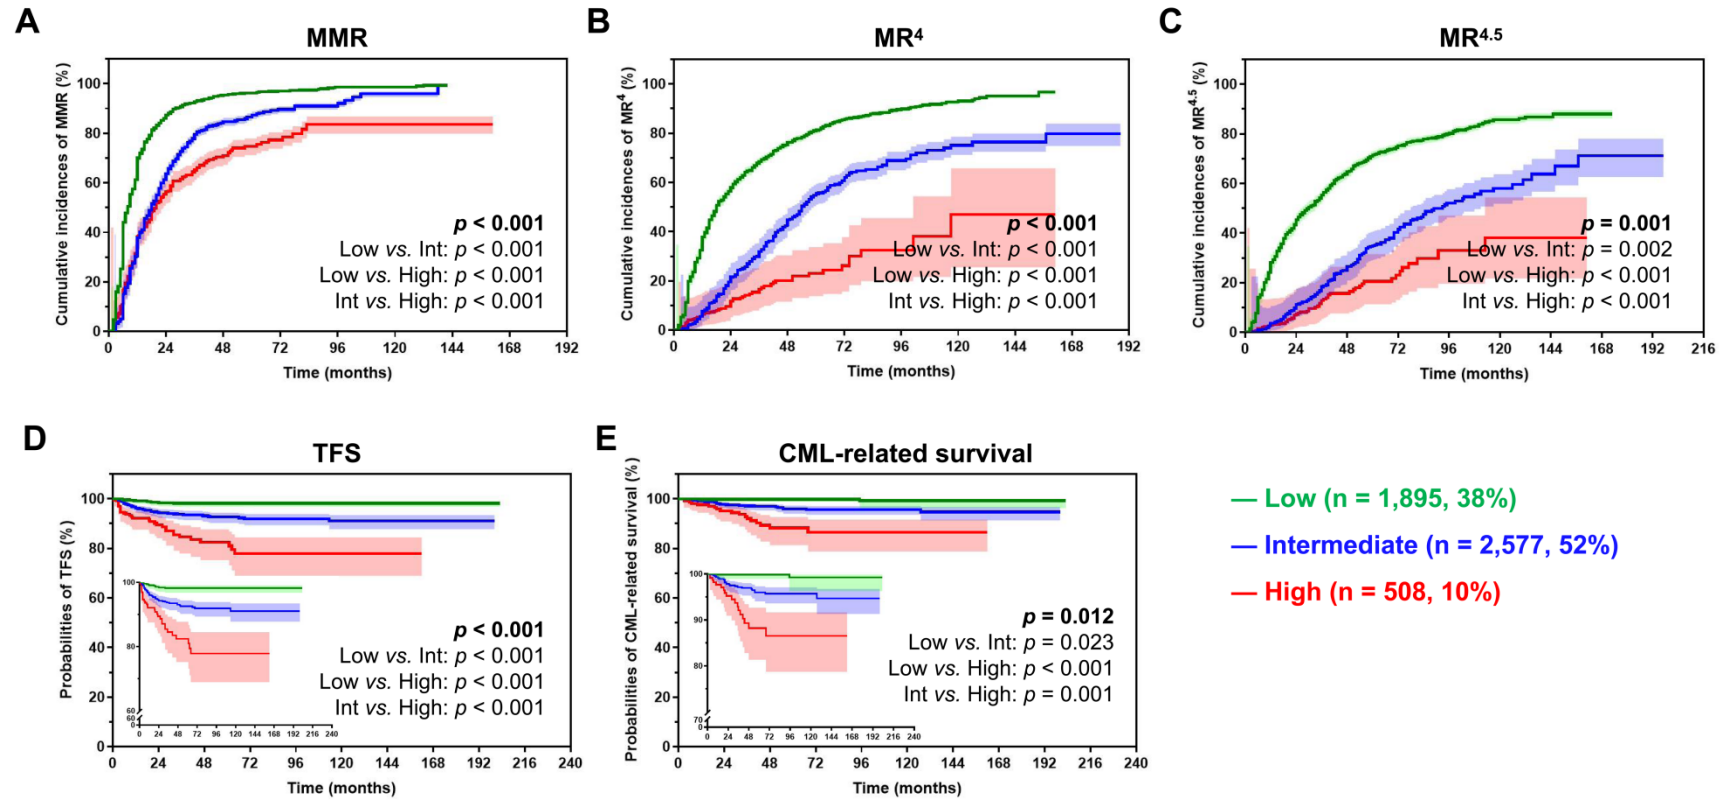

**Supplement Figure 6. Cumulative incidences of molecular responses and probabilities of TFS, CML-related survival by the predictive model.**

MMR, major molecular response; MR<sup>4</sup>, molecular response 4; MR<sup>4.5</sup>, molecular response 4.5; TFS, transformation-free survival.

Shaded area is the 95% Confidence Interval.



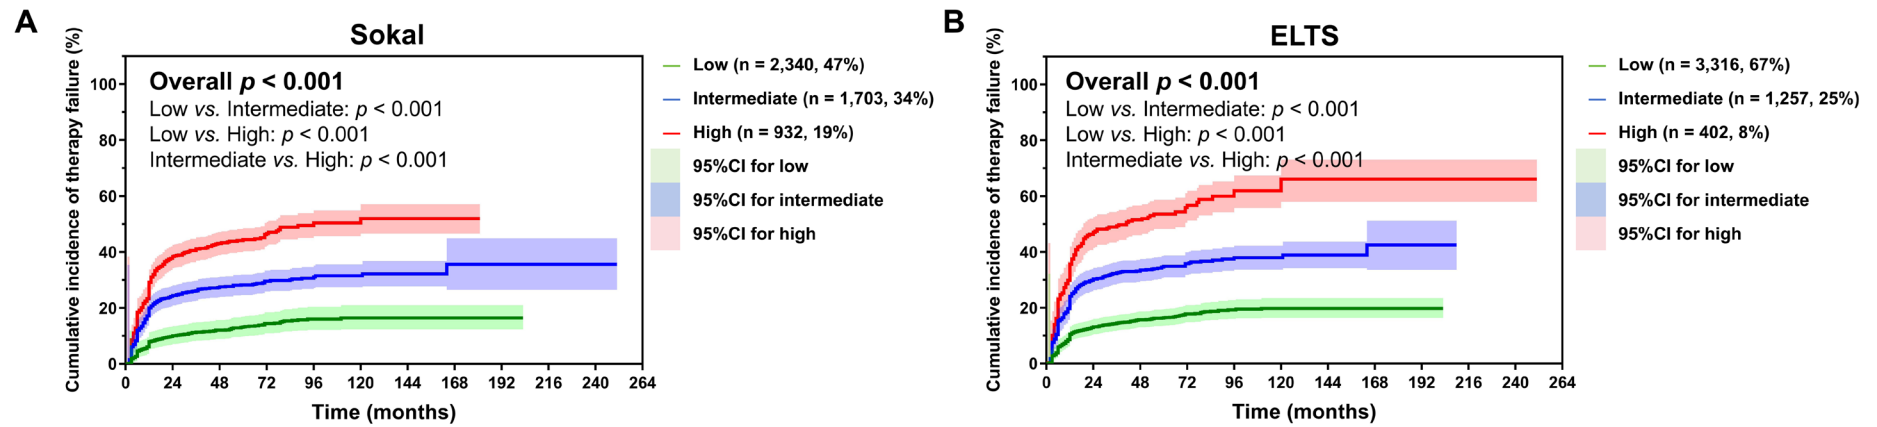

**Supplement Figure 7. Cumulative incidences of therapy-failure by the Sokal and ELTS risk subgroups in the entire dataset.**

ELTS, EUTOs long-term survival score; Shaded area is the 95% Confidence Interval.

(A) By Sokal risk score; (B) By ELTS score.

**A**

**Entire cohort**

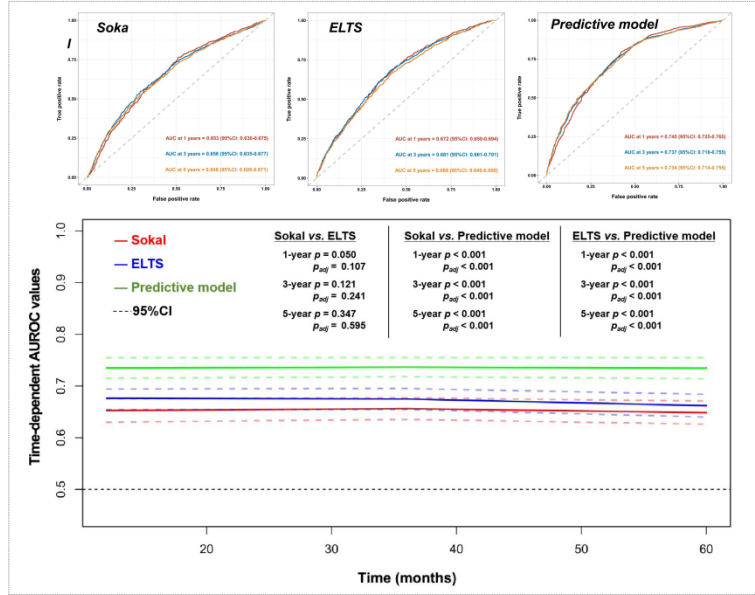

**B**

**Imatinib cohort**

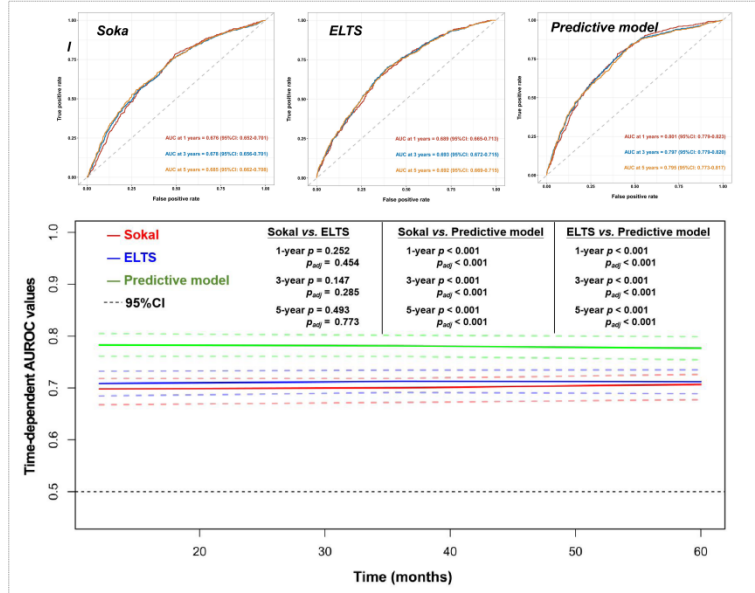

**C**

**2G-TKI cohort**

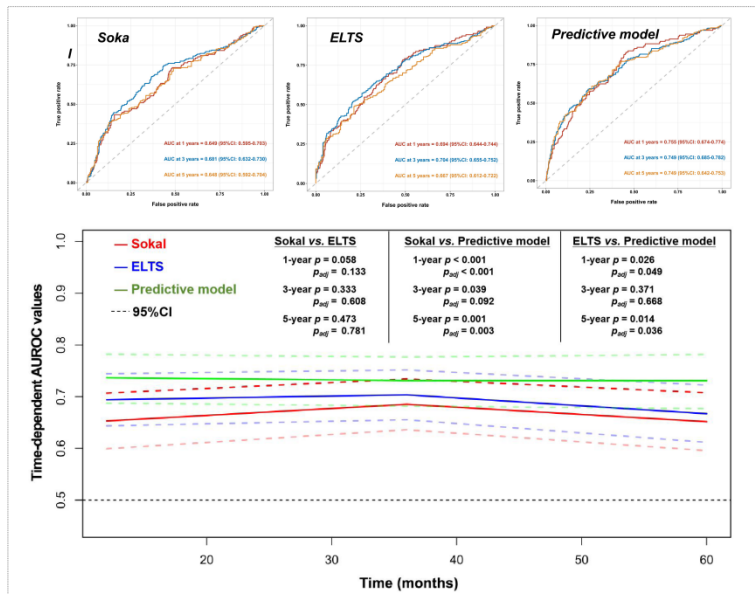

**Supplement Figure 8. The 1-, 3- and 5-year area under the receiver operating characteristic curve (AUROC) values of Sokal, ELTS and the therapy-failure models in the entire, imatinib and 2G-TKI cohorts.**

2G-TKI, the second-generation tyrosine kinase inhibitor.

(A) Entire cohort; (B) Imatinib cohort; (C) 2G-TKI cohort.

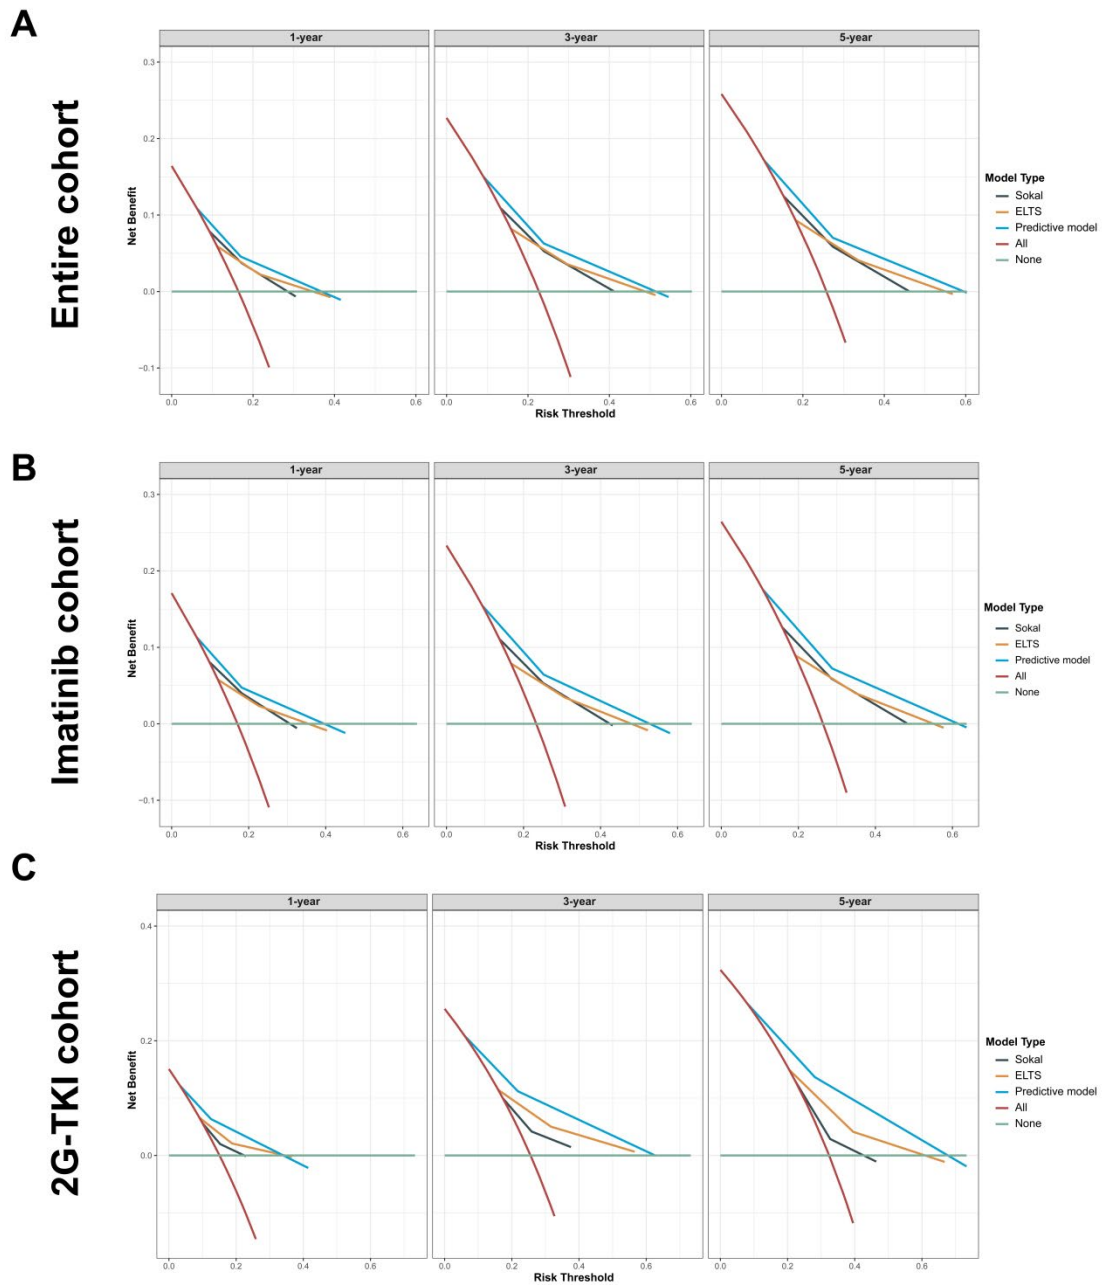

**Supplement Figure 9. Decision curve analyses (DCA) of the predictive model, Sokal and ELTS scores for predicting the 1-, 3- and 5-year cumulative incidences of the therapy-failure in the total, imatinib and 2G-TKI cohorts.**

2G-TKI, the second-generation tyrosine kinase inhibitor.

(A) Entire cohort; (B) Imatinib cohort; (C) 2G-TKI cohort.

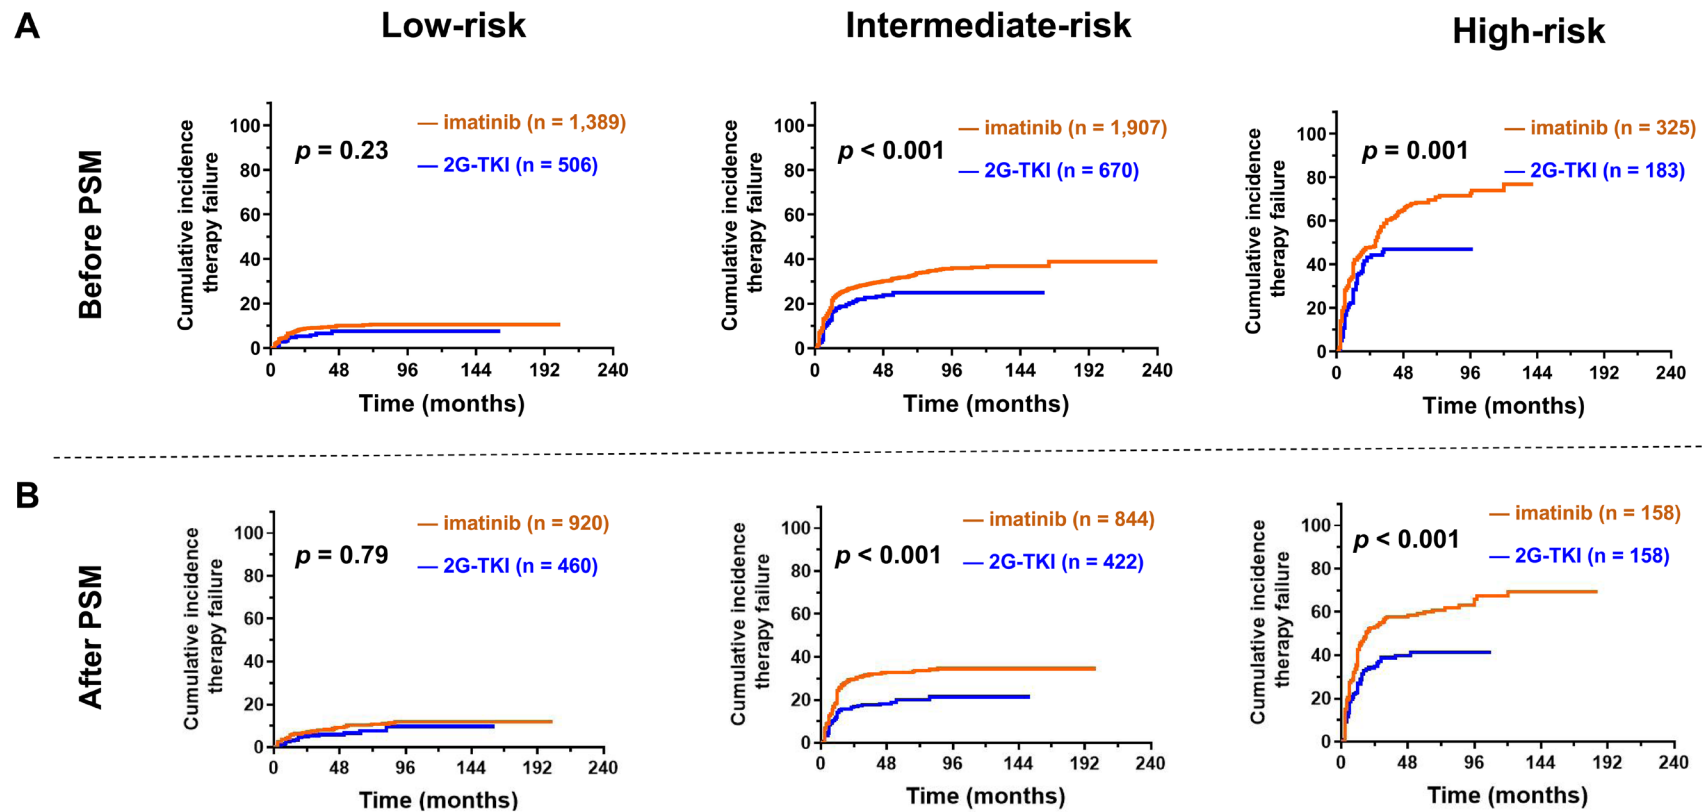

**Supplement Figure 10. Comparison of the cumulative incidences of therapy-failure between subjects receiving initial 2G-TKI- and imatinib-therapy using the predictive model before and after propensity-score matching (PSM) analyses.**

(A) Before PSM analyses; (B) After PSM analyses.
